# Supplementary material for: Exome sequencing in undiagnosed congenital myopathy reveals new genes and refines genes–phenotypes correlations
Source: PubMed Central journal article supplement (PMC11234750; doi:10.1186/s13073-024-01353-0), 2024-07-09
Supplement: 13073_2024_1353_MOESM2_ESM.pdf [file 13073_2024_1353_MOESM2_ESM.pdf]

### 1 family member

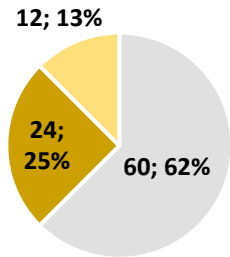

■ No diagnosis ■ Diagnosis ■ Candidate

### 2 family members

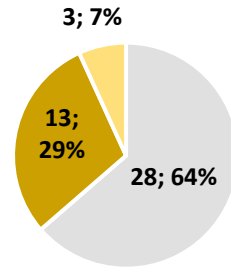

■ No diagnosis ■ Diagnosis ■ Candidate

### 3 family members

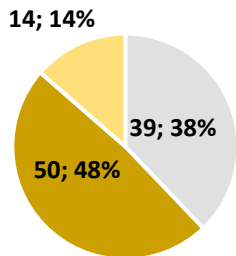

■ No diagnosis ■ Diagnosis ■ Candidate

### > 3 family members

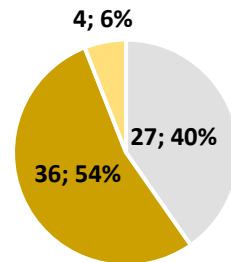

■ No diagnosis ■ Diagnosis ■ Candidate

**Fig S1: Diagnostic yield of exome sequencing as a function of the number of included family members.**

### 1 affected family member

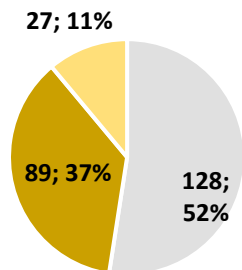

■ No diagnosis ■ Diagnosis ■ Candidate

### 2 affected family members

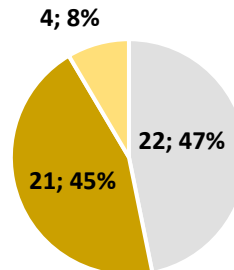

■ No diagnosis ■ Diagnosis ■ Candidate

### 3 affected family members

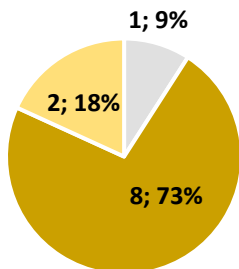

■ No diagnosis ■ Diagnosis ■ Candidate

### > 3 affected family members

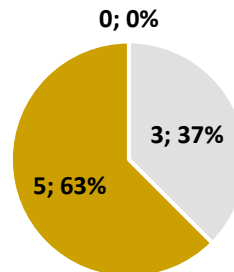

■ No diagnosis ■ Diagnosis ■ Candidate

**Fig S2: Diagnostic yield of exome sequencing as a function of the number of included affected family members.**

Without muscle biopsy

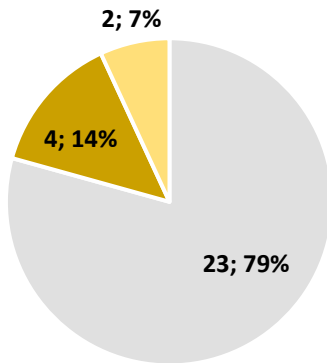

With muscle biopsy

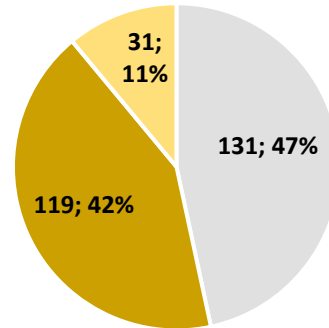

■ No diagnosis ■ Diagnosis ■ Candidate

■ No diagnosis ■ Diagnosis ■ Candidate

**Fig S3: Diagnostic yield of exome sequencing with or without muscle biopsy.**
